# Supplementary material for: Genetic diversity and diversification patterns of puma (Puma concolor) populations in the southern end of the species distribution
Source: Frontiers journal article supplement (doi:10.3389/fevo.2024.1436320), 2024-09-10
Supplement: Table_2.xlsx [file Table_2.xlsx]

## Sheet: Hoja1
Supplementary Table 2. Saturation tests for mitochondrial DNA fragments used in phylogenetic analyses
	Iss	IssSym	T	DF	P	IddAsym	T	DF	P
	ND5
	0.0084	0.7436	187.969	661	0	0.5905	148.824	661	0
	CR
	0.0164	0.6976	76.8428	277	0	0.5472	59.8717	277	0
